# Supplementary material for: Longitudinal characterisation of haematological and biochemical parameters in cancer patients prior to and during COVID-19 reveals features associated with outcome
Source: PubMed Central journal article supplement — ESMO Open. 2020 Nov 27;6(1):100005. doi: 10.1016/j.esmoop.2020.100005 (PMC7808077; doi:10.1016/j.esmoop.2020.100005), 2020-11-27
Supplement: mmc2.pdf [file mmc2.pdf]

**Supplementary table 1. Summary of univariable and multivariable analyses performed for clinical, haematological and biochemical parameters**

| Covariate                   | Outcome     | Cohort     | Univariable analysis |                    |                   |               |               |         |                     |                  | Multivariable analysis |         |                     |
|-----------------------------|-------------|------------|----------------------|--------------------|-------------------|---------------|---------------|---------|---------------------|------------------|------------------------|---------|---------------------|
|                             |             |            | Total # of records   | # of outcome = YES | # of outcome = NO | YES mean (sd) | NO mean (sd)  | P value | Sig. <sup>[1]</sup> | Effect size (CL) | OR (95% CI)            | P value | Sig. <sup>[1]</sup> |
| Age                         | Required O2 | all        | 283                  | 157 (55%)          | 126 (45%)         | 70.0 (10.5)   | 62.49 (15.63) | <0.001  | ***                 | 0.63             | 1.03 ( 1.00-1.05)      | 0.042   | *                   |
|                             | Death       |            | 300                  | 104 (35%)          | 196 (65%)         | 71.98 (10.88) | 64.22 (14.15) | <0.001  | ***                 | 0.66             | 1.04 ( 1.01-1.07)      | 0.002   | **                  |
| Total # of comorbidities    | Required O2 |            | 260                  | 145 (56%)          | 115 (44%)         | 1.76 (1.58)   | 1.14 (1.3)    | <0.001  | ***                 | 0.52             | 1.11 ( 0.88-1.39)      | 0.377   |                     |
|                             | Death       |            | 273                  | 89 (33%)           | 184 (67%)         | 1.68 (1.39)   | 1.35 (1.51)   | 0.010   | **                  | 0.52             | 0.94 ( 0.77-1.14)      | 0.535   |                     |
| Lymphocyte                  | Required O2 | UK         | 152                  | 93 (61%)           | 59 (39%)          |               |               |         |                     |                  |                        |         |                     |
|                             |             | Liverpool  | 53                   | 34 (64%)           | 19 (36%)          |               |               |         |                     |                  |                        |         |                     |
|                             |             | Manchester | 57                   | 25 (44%)           | 32 (56%)          |               |               |         |                     |                  |                        |         |                     |
|                             |             | all        | 252                  | 152 (60%)          | 110 (44%)         | 0.94 (1.55)   | 1.05 (1.85)   | 0.043   | *                   | 0.56             | 1.02 ( 0.83-1.26)      | 0.832   |                     |
|                             | Death       | UK         | 168                  | 63 (38%)           | 105 (63%)         |               |               |         |                     |                  |                        |         |                     |
|                             |             | Liverpool  | 53                   | 26 (49%)           | 27 (51%)          |               |               |         |                     |                  |                        |         |                     |
|                             |             | Manchester | 57                   | 10 (18%)           | 47 (82%)          |               |               |         |                     |                  |                        |         |                     |
| all                         | 278         | 99 (36%)   | 179 (64%)            | 1.04 (1.88)        | 0.92 (1.49)       | 0.126         |               | 0.54    | 1.11 ( 0.91-1.37)   | 0.302            |                        |         |                     |
| Neutrophil                  | Required O2 | UK         | 152                  | 93 (61%)           | 59 (39%)          |               |               |         |                     |                  |                        |         |                     |
|                             |             | Liverpool  | 54                   | 34 (63%)           | 20 (37%)          |               |               |         |                     |                  |                        |         |                     |
|                             |             | Manchester | 58                   | 26 (45%)           | 32 (55%)          |               |               |         |                     |                  |                        |         |                     |
|                             |             | all        | 264                  | 153 (58%)          | 111 (42%)         | 6.36 (6.25)   | 4.42 (4.93)   | <0.001  | ***                 | 0.65             | 1.04 ( 0.93-1.16)      | 0.47    |                     |
|                             | Death       | UK         | 168                  | 63 (38%)           | 105 (63%)         |               |               |         |                     |                  |                        |         |                     |
|                             |             | Liverpool  | 54                   | 27 (50%)           | 27 (50%)          |               |               |         |                     |                  |                        |         |                     |
|                             |             | Manchester | 58                   | 10 (17%)           | 48 (83%)          |               |               |         |                     |                  |                        |         |                     |
| all                         | 280         | 100 (36%)  | 180 (64%)            | 6.58 (7.29)        | 4.88 (4.57)       | 0.007         | **            | 0.6     | 1.00 ( 0.93-1.08)   | 0.937            |                        |         |                     |
| Neutrophil:Lymphocyte ratio | Required O2 | UK         | 150                  | 92 (61%)           | 58 (39%)          |               |               |         |                     |                  |                        |         |                     |
|                             |             | Liverpool  | 53                   | 34 (64%)           | 19 (36%)          |               |               |         |                     |                  |                        |         |                     |
|                             |             | Manchester | 56                   | 24 (43%)           | 32 (57%)          |               |               |         |                     |                  |                        |         |                     |
|                             |             | all        | 259                  | 150 (58%)          | 109 (42%)         | 13.2 (21.62)  | 6.57 (7.79)   | <0.001  | ***                 | 0.67             | 1.04 ( 0.98-1.09)      | 0.166   |                     |
|                             | Death       | UK         | 166                  | 63 (38%)           | 103 (62%)         |               |               |         |                     |                  |                        |         |                     |
|                             |             | Liverpool  | 53                   | 26 (49%)           | 27 (51%)          |               |               |         |                     |                  |                        |         |                     |
|                             |             | Manchester | 56                   | 10 (18%)           | 46 (82%)          |               |               |         |                     |                  |                        |         |                     |
| all                         | 275         | 99 (36%)   | 176 (64%)            | 15.93 (27.91)      | 7.97 (8.16)       | 0.010         | **            | 0.59    | 1.03 ( 1.00-1.07)   | 0.036            | *                      |         |                     |
| C-reactive protein          | Required O2 | UK         | 163                  | 93 (57%)           | 53 (33%)          |               |               |         |                     |                  |                        |         |                     |
|                             |             | Liverpool  | 42                   | 28 (67%)           | 14 (33%)          |               |               |         |                     |                  |                        |         |                     |

| Covariate                         | Outcome     | Cohort     | Univariable analysis |                    |                                               |                                             |               |         |                          |                   | Multivariable analysis |         |                     |
|-----------------------------------|-------------|------------|----------------------|--------------------|-----------------------------------------------|---------------------------------------------|---------------|---------|--------------------------|-------------------|------------------------|---------|---------------------|
|                                   |             |            | Total # of records   | # of outcome = YES | # of outcome = NO                             | YES mean (sd)                               | NO mean (sd)  | P value | Sig. <sup>[1]</sup>      | Effect size (CL)  | OR (95% CI)            | P value | Sig. <sup>[1]</sup> |
|                                   |             | Manchester | 54                   | 27 (50%)           | 27 (50%)                                      |                                             |               |         |                          |                   |                        |         |                     |
|                                   |             | all        | 259                  | 148 (57%)          | 94 (36%)                                      | 122.25 (100.45)                             | 61.19 (70.11) | <0.001  | ***                      | 0.72              | 1.01 ( 1.00-1.01)      | 0.002   | **                  |
|                                   | Death       | UK         | 163                  | 63 (39%)           | 100 (61%)                                     |                                             |               |         |                          |                   |                        |         |                     |
|                                   |             | Liverpool  | 42                   | 23 (55%)           | 19 (45%)                                      |                                             |               |         |                          |                   |                        |         |                     |
|                                   |             | Manchester | 54                   | 10 (19%)           | 44 (81%)                                      |                                             |               |         |                          |                   |                        |         |                     |
| all                               | 259         | 96 (37%)   | 163 (63%)            | 133.35 (107.59)    | 79.07 (78.64)                                 | <0.001                                      | ***           | 0.66    | 1.00 ( 1.00-1.01)        | 0.004             | **                     |         |                     |
| Albumin                           | Required O2 | UK         | 149                  | 90 (60%)           | 59 (40%)                                      |                                             |               |         |                          |                   |                        |         |                     |
|                                   |             | Liverpool  | 40                   | 26 (65%)           | 14 (35%)                                      |                                             |               |         |                          |                   |                        |         |                     |
|                                   |             | Manchester | 63                   | 27 (43%)           | 36 (57%)                                      |                                             |               |         |                          |                   |                        |         |                     |
|                                   |             | all        | 252                  | 143 (57%)          | 109 (43%)                                     | 31.68 (7.09)                                | 37.16 (6.11)  | <0.001  | ***                      | 0.71              | 0.91 ( 0.86-0.95)      | <0.001  | ***                 |
|                                   | Death       | UK         | 166                  | 63 (38%)           | 103 (62%)                                     |                                             |               |         |                          |                   |                        |         |                     |
|                                   |             | Liverpool  | 40                   | 18 (45%)           | 22 (55%)                                      |                                             |               |         |                          |                   |                        |         |                     |
|                                   |             | Manchester | 63                   | 10 (16%)           | 53 (84%)                                      |                                             |               |         |                          |                   |                        |         |                     |
|                                   |             | all        | 269                  | 91 (34%)           | 178 (66%)                                     | 31.0 (7.85)                                 | 35.08 (6.56)  | <0.001  | ***                      | 0.63              | 0.95 ( 0.91-0.99)      | 0.02    | *                   |
|                                   |             |            |                      |                    | Covariate = True and outcome = YES (% in YES) | Covariate = True and outcome = NO (% in NO) |               |         | Effect size (Cramer's V) |                   |                        |         |                     |
| Sex (Male)                        | Required O2 | all        | 283                  | 157 (55%)          | 126 (45%)                                     | 96 (61%)                                    | 56 (44%)      | 0.047   |                          | 0.11              | 1.25 ( 0.68-2.27)      | 0.473   |                     |
|                                   | Death       |            | 300                  | 104 (35%)          | 196 (65%)                                     | 65 (63%)                                    | 98 (50%)      | 0.047   | *                        | 0.11              | 1.27 ( 0.72-2.23)      | 0.409   |                     |
| Haematological cancer             | Required O2 |            | 283                  | 157 (55%)          | 126 (45%)                                     | 49 (31%)                                    | 31 (25%)      | 0.020   |                          | 0.13              | 1.35 ( 0.69-2.64)      | 0.389   |                     |
|                                   | Death       |            | 300                  | 104 (35%)          | 196 (65%)                                     | 39 (38%)                                    | 47 (24%)      | 0.020   | *                        | 0.13              | 2.00 ( 1.05-3.79)      | 0.034   | *                   |
| Chemotherapy                      | Required O2 |            | 283                  | 157 (55%)          | 126 (45%)                                     | 49 (31%)                                    | 31 (25%)      | 0.094   |                          | 0.10              | 0.55 ( 0.29-1.01)      | 0.055   |                     |
|                                   | Death       |            | 300                  | 104 (35%)          | 196 (65%)                                     | 33 (32%)                                    | 83 (42%)      | 0.094   |                          | 0.10              | 0.71 ( 0.39-1.31)      | 0.278   |                     |
| Immunotherapy                     | Required O2 |            | 283                  | 157 (55%)          | 126 (45%)                                     | 10 (6%)                                     | 4 (3%)        | 0.436   |                          | 0.04              | 3.18 ( 0.77-13.16)     | 0.11    |                     |
|                                   | Death       |            | 300                  | 104 (35%)          | 196 (65%)                                     | 3 (3%)                                      | 11 (6%)       | 0.436   |                          | 0.04              | 0.66 ( 0.16-2.69)      | 0.561   |                     |
| Targeted therapy                  | Required O2 |            | 283                  | 157 (55%)          | 126 (45%)                                     | 22 (14%)                                    | 20 (16%)      | 0.963   |                          | 0.00              | 1.44 ( 0.64-3.25)      | 0.374   |                     |
|                                   | Death       |            | 300                  | 104 (35%)          | 196 (65%)                                     | 16 (15%)                                    | 32 (16%)      | 0.963   |                          | 0.00              | 1.05 ( 0.49-2.26)      | 0.905   |                     |
| Cancer stage (Distant metastases) | Required O2 | 260        | 145 (56%)            | 115 (44%)          | 103 (71%)                                     | 70 (61%)                                    | 0.496         |         | 0.04                     | 1.27 ( 0.68-2.38) | 0.448                  |         |                     |
|                                   | Death       | 273        | 89 (33%)             | 184 (67%)          | 62 (70%)                                      | 119 (65%)                                   | 0.496         |         | 0.04                     | 1.16 ( 0.63-2.15) | 0.635                  |         |                     |

[1] – Significance: \* - P value < 0.05, \*\* - P value < 0.01, \*\*\* - P value < 0.001

No imputation was performed for univariable analysis. For multivariable analysis missing data were: CRP 14.0%, lymphocyte 7.6%, neutrophil 7.0%, neutrophil:lymphocyte ratio 8.6%, platelets 4.7%, albumin 10.6%, cancer stage 9.3%. Numeric variable imputed using Bayesian ridge regression (with logarithmic transformation where appropriate), cancer stage imputed using logistic regression.

**Supplementary table 2. Summary of univariable analyses performed for haematological and biochemical parameters (excluded from the multivariable analysis)**

| Parameter               | Range                                                                                  | Outcome               | Cohort     | Total # of records | # of outcome = YES | # of outcome = NO | YES mean (sd) | NO mean (sd) | P value | Sig. <sup>[1]</sup> | Effect size (CL) |
|-------------------------|----------------------------------------------------------------------------------------|-----------------------|------------|--------------------|--------------------|-------------------|---------------|--------------|---------|---------------------|------------------|
| Lymphocyte              | Minimum value from day 0 to 14 (during COVID-19 illness)                               | Required O2           | Liverpool  | 56                 | 33 (59%)           | 23 (41%)          | 0.57 (0.62)   | 0.99 (1.79)  | 0.005   | **                  | 0.61             |
|                         |                                                                                        |                       | Manchester | 57                 | 25 (44%)           | 32 (56%)          |               |              |         |                     |                  |
|                         |                                                                                        |                       | all        | 113                | 58 (51%)           | 55 (49%)          |               |              |         |                     |                  |
|                         |                                                                                        | Death                 | Liverpool  | 56                 | 25 (45%)           | 31 (55%)          |               |              |         |                     |                  |
|                         |                                                                                        |                       | Manchester | 57                 | 10 (18%)           | 47 (82%)          |               |              |         |                     |                  |
|                         |                                                                                        |                       | all        | 113                | 35 (31%)           | 78 (69%)          |               |              |         |                     |                  |
|                         | CHRONIC: Average value from day -170 to -15                                            | Required O2           | Liverpool  | 61                 | 36 (59%)           | 25 (41%)          | 1.51 (2.34)   | 1.7 (2.88)   | 0.264   |                     | 0.56             |
|                         |                                                                                        |                       | Manchester | 53                 | 22 (42%)           | 31 (58%)          |               |              |         |                     |                  |
|                         |                                                                                        |                       | all        | 114                | 58 (51%)           | 56 (49%)          |               |              |         |                     |                  |
|                         |                                                                                        | Death                 | Liverpool  | 61                 | 28 (46%)           | 33 (54%)          |               |              |         |                     |                  |
|                         |                                                                                        |                       | Manchester | 53                 | 9 (17%)            | 44 (83%)          |               |              |         |                     |                  |
|                         |                                                                                        |                       | all        | 114                | 37 (32%)           | 77 (68%)          |               |              |         |                     |                  |
|                         | IMMED: Value at day -15                                                                | Required O2           | Liverpool  | 61                 | 36 (59%)           | 25 (41%)          | 1.31 (0.79)   | 1.73 (2.89)  | 0.471   |                     | 0.52             |
|                         |                                                                                        |                       | Manchester | 53                 | 22 (42%)           | 31 (58%)          |               |              |         |                     |                  |
|                         |                                                                                        |                       | all        | 114                | 58 (51%)           | 56 (49%)          |               |              |         |                     |                  |
|                         |                                                                                        | Death                 | Liverpool  | 61                 | 28 (46%)           | 33 (54%)          |               |              |         |                     |                  |
|                         |                                                                                        |                       | Manchester | 53                 | 9 (17%)            | 44 (83%)          |               |              |         |                     |                  |
|                         |                                                                                        |                       | all        | 114                | 37 (32%)           | 77 (68%)          |               |              |         |                     |                  |
|                         | CHRONIC: Average value from day -170 to -15                                            | Haematological cancer | Liverpool  | 61                 | 24 (39%)           | 37 (61%)          | 2.27 (4.69)   | 1.32 (0.55)  | 0.183   |                     | 0.58             |
|                         |                                                                                        |                       | Manchester | 53                 | 10 (19%)           | 43 (81%)          |               |              |         |                     |                  |
|                         |                                                                                        |                       | all        | 114                | 34 (30%)           | 80 (70%)          |               |              |         |                     |                  |
| IMMED: Value at day -15 | Haematological cancer                                                                  | Liverpool             | 61         | 24 (39%)           | 37 (61%)           | 1.98 (3.71)       | 1.32 (0.67)   | 0.958        |         | 0.48                |                  |
|                         |                                                                                        | Manchester            | 53         | 10 (19%)           | 43 (81%)           |                   |               |              |         |                     |                  |
|                         |                                                                                        | all                   | 114        | 34 (30%)           | 80 (70%)           |                   |               |              |         |                     |                  |
| Value at day 0          | Haematological cancer                                                                  | UK                    | 168        | 42 (25%)           | 126 (75%)          | 1.16 (2.7)        | 0.89 (0.99)   | 0.004        | **      | 0.59                |                  |
|                         |                                                                                        | Liverpool             | 53         | 20 (38%)           | 33 (62%)           |                   |               |              |         |                     |                  |
|                         |                                                                                        | Manchester            | 57         | 13 (23%)           | 44 (77%)           |                   |               |              |         |                     |                  |
|                         |                                                                                        | all                   | 278        | 75 (27%)           | 203 (73%)          |                   |               |              |         |                     |                  |
| Neutrophil              | Maximum value from day 0 to 14 (during COVID-19 illness) (GCSF in Manchester excluded) | Required O2           | Liverpool  | 57                 | 33 (58%)           | 24 (42%)          | 8.07 (6.87)   | 6.34 (5.42)  | 0.086   |                     | 0.59             |
|                         |                                                                                        |                       | Manchester | 50                 | 24 (48%)           | 26 (52%)          |               |              |         |                     |                  |
|                         |                                                                                        |                       | all        | 107                | 57 (53%)           | 50 (47%)          |               |              |         |                     |                  |
|                         |                                                                                        | Death                 | Liverpool  | 57                 | 26 (46%)           | 31 (54%)          |               |              |         |                     |                  |
|                         |                                                                                        |                       | Manchester | 50                 | 10 (20%)           | 40 (80%)          |               |              |         |                     |                  |
|                         |                                                                                        |                       | all        | 107                | 36 (34%)           | 71 (66%)          |               |              |         |                     |                  |
|                         |                                                                                        |                       |            |                    | 8.94 (7.87)        | 6.45 (5.21)       | 0.026         | *            | 0.63    |                     |                  |

| Parameter                   | Range                                                                                  | Outcome               | Cohort     | Total # of records | # of outcome = YES | # of outcome = NO | YES mean (sd)   | NO mean (sd)   | P value | Sig. <sup>[1]</sup> | Effect size (CL) |
|-----------------------------|----------------------------------------------------------------------------------------|-----------------------|------------|--------------------|--------------------|-------------------|-----------------|----------------|---------|---------------------|------------------|
|                             | Minimum value from day 0 to 14 (during COVID-19 illness) (GCSF in Manchester excluded) | Required O2           | Liverpool  | 57                 | 33 (58%)           | 24 (42%)          | 3.84 (3.26)     | 3.44 (4.31)    | 0.382   |                     | 0.54             |
|                             |                                                                                        |                       | Manchester | 50                 | 24 (48%)           | 26 (52%)          |                 |                |         |                     |                  |
|                             |                                                                                        |                       | all        | 107                | 57 (53%)           | 50 (47%)          |                 |                |         |                     |                  |
|                             |                                                                                        | Death                 | Liverpool  | 57                 | 26 (46%)           | 31 (54%)          | 4.62 (4.34)     | 3.21 (3.46)    | 0.244   |                     | 0.56             |
|                             |                                                                                        |                       | Manchester | 50                 | 10 (20%)           | 40 (80%)          |                 |                |         |                     |                  |
|                             |                                                                                        |                       | all        | 107                | 36 (34%)           | 71 (66%)          |                 |                |         |                     |                  |
|                             | CHRONIC: Average value from day -170 to -15                                            | Required O2           | Manchester | 54                 | 23 (43%)           | 31 (57%)          | 4.48 (2.93)     | 4.03 (2.84)    | 0.807   |                     | 0.52             |
|                             |                                                                                        | Death                 | Manchester | 54                 | 9 (17%)            | 45 (83%)          | 3.44 (1.79)     | 4.38 (3.02)    | 0.562   |                     | 0.56             |
|                             | IMMED: Value at day -15                                                                | Required O2           | Liverpool  | 58                 | 34 (59%)           | 24 (41%)          | 5.07 (4.37)     | 4.6 (3.89)     | 0.545   |                     | 0.53             |
|                             |                                                                                        |                       | Manchester | 54                 | 23 (43%)           | 31 (57%)          |                 |                |         |                     |                  |
|                             |                                                                                        |                       | all        | 112                | 57 (51%)           | 55 (49%)          |                 |                |         |                     |                  |
|                             |                                                                                        | Death                 | Liverpool  | 58                 | 26 (45%)           | 32 (55%)          | 5.57 (5.12)     | 4.51 (3.58)    | 0.5     |                     | 0.54             |
|                             |                                                                                        |                       | Manchester | 54                 | 9 (17%)            | 45 (83%)          |                 |                |         |                     |                  |
|                             |                                                                                        |                       | all        | 112                | 35 (31%)           | 77 (69%)          |                 |                |         |                     |                  |
|                             | CHRONIC: Average value from day -170 to -15                                            | Haematological cancer | Manchester | 54                 | 11 (20%)           | 43 (80%)          | 4.02 (4.6)      | 4.27 (2.3)     | 0.103   |                     | 0.66             |
|                             | IMMED: Value at day -15                                                                | Haematological cancer | Liverpool  | 58                 | 23 (40%)           | 35 (60%)          | 3.37 (3.21)     | 5.49 (4.33)    | 0.002   | **                  | 0.68             |
| Manchester                  |                                                                                        |                       | 54         | 11 (20%)           | 43 (80%)           |                   |                 |                |         |                     |                  |
| all                         |                                                                                        |                       | 112        | 34 (30%)           | 78 (70%)           |                   |                 |                |         |                     |                  |
| Value at day 0              | Haematological cancer                                                                  | UK                    | 168        | 42 (25%)           | 126 (75%)          | 4.56 (8.09)       | 5.84 (4.52)     | 0.001          | ***     | 0.67                |                  |
|                             |                                                                                        | Liverpool             | 54         | 21 (39%)           | 33 (61%)           |                   |                 |                |         |                     |                  |
|                             |                                                                                        | Manchester            | 58         | 14 (24%)           | 44 (76%)           |                   |                 |                |         |                     |                  |
|                             |                                                                                        | all                   | 280        | 77 (28%)           | 203 (73%)          |                   |                 |                |         |                     |                  |
| Neutrophil:Lymphocyte ratio | Max increase rate 0-14 days (during COVID-19 illness)                                  | Required O2           | Manchester | 46                 | 23 (50%)           | 23 (50%)          | 16.13 (35.33)   | 4.96 (12.37)   | 0.003   | **                  | 0.75             |
|                             |                                                                                        | Death                 | Manchester | 46                 | 9 (20%)            | 37 (80%)          | 33.3 (53.4)     | 5.02 (10.08)   | 0.004   | **                  | 0.81             |
| C-reactive protein          | Max increase rate                                                                      | Required O2           | Manchester | 48                 | 26 (54%)           | 22 (46%)          | 30.17 (29.14)   | 14.27 (21.15)  | 0.013   | *                   | 0.71             |
|                             |                                                                                        | Death                 | Manchester | 48                 | 10 (21%)           | 38 (79%)          | 44.1 (38.22)    | 17.3 (20.0)    | 0.009   | **                  | 0.77             |
| LDH                         | Value at day 0                                                                         | Required O2           | UK         | 30                 | 21 (70%)           | 9 (30%)           | 481.67 (252.55) | 295.33 (77.97) | <0.001  | ***                 | 0.72             |
|                             |                                                                                        |                       | Manchester | 62                 | 25 (40%)           | 37 (60%)          |                 |                |         |                     |                  |
|                             |                                                                                        |                       | all        | 92                 | 46 (50%)           | 46 (50%)          |                 |                |         |                     |                  |
|                             |                                                                                        | Death                 | UK         | 33                 | 11 (33%)           | 22 (67%)          |                 |                |         |                     |                  |
|                             |                                                                                        |                       | Manchester | 62                 | 9 (15%)            | 53 (85%)          |                 |                |         |                     |                  |

| Parameter | Range                   | Outcome     | Cohort     | Total # of records | # of outcome = YES | # of outcome = NO | YES mean (sd)      | NO mean (sd)       | P value | Sig. <sup>[1]</sup> | Effect size (CL) |
|-----------|-------------------------|-------------|------------|--------------------|--------------------|-------------------|--------------------|--------------------|---------|---------------------|------------------|
|           |                         |             | all        | 95                 | 20 (21%)           | 75 (79%)          | 489.05<br>(221.85) | 378.99<br>(227.41) | 0.008   | **                  | 0.69             |
|           | Max increase rate       | Required O2 | Manchester | 46                 | 23 (50%)           | 23 (50%)          | 100.66<br>(79.6)   | 34.48<br>(55.93)   | 0.001   |                     | 0.78             |
|           |                         | Death       | Manchester | 46                 | 9 (20%)            | 37 (80%)          | 142.0<br>(84.93)   | 49.47<br>(62.12)   | 0.002   |                     | 0.83             |
|           | IMMED: Value at day -15 | Required O2 | Manchester | 57                 | 24 (42%)           | 33 (58%)          | 253.33<br>(76.88)  | 237.33<br>(53.55)  | 0.513   |                     | 0.55             |
|           |                         | Death       | Manchester | 57                 | 10 (18%)           | 47 (82%)          | 231.1<br>(55.11)   | 246.83<br>(66.24)  | 0.564   |                     | 0.56             |

[1] – Significance: \* - P value < 0.05, \*\* - P value < 0.01, \*\*\* - P value < 0.001

No imputation was performed for univariable analysis.

**Supplementary table 3. Characteristics of cancer patients presenting in Manchester**

| <b>Characteristic</b>                 | <b>Number<br/>(percentage)</b> |
|---------------------------------------|--------------------------------|
| Median Age (range)                    | 65 (19-82)                     |
| Sex - Male                            | 36 (53.7)                      |
| - Female                              | 31 (46.3)                      |
| Comorbidities                         |                                |
| Hypertension                          | 12 (17.9)                      |
| Chronic obstructive pulmonary disease | 6 (9.0)                        |
| Diabetes                              | 10 (14.9)                      |
| Cardiovascular disease                | 7 (10.4)                       |
| Smoking status                        |                                |
| Never                                 | 23 (34.3)                      |
| Ex-smoker                             | 26 (38.8)                      |
| Current                               | 4 (6.0)                        |
| Not available                         | 14 (20.6)                      |
| Cancer type                           |                                |
| Haematological                        | 49 (73.1)                      |
| Solid                                 | 18 (26.9)                      |
| Cancer Stage                          |                                |
| Early stage/radical intent            | 18 (26.9)                      |
| Advanced/Distant metastases           | 48 (71.6)                      |
| Unknown                               | 1 (1.5)                        |
| Therapy within 4 weeks of infection*  |                                |
| Chemotherapy                          | 31 (46.3)                      |
| Targeted therapy                      | 9 (13.4)                       |
| Radiation therapy                     | 7 (10.4)                       |
| Immune therapy                        | 6 (9.0)                        |
| Other**                               | 9 (13.4)                       |

\* Can have more than one therapy

\*\*Other= including hormone treatment

**Supplementary table 4. Characteristics of cancer patients presenting in Liverpool**

| <b>Characteristic</b>                 | <b>Number<br/>(percentage)</b> |
|---------------------------------------|--------------------------------|
| Median Age (range)                    | 74 (36-93)                     |
| Sex - Male                            | 33 (53.2)                      |
| - Female                              | 29 (46.8)                      |
| Comorbidities                         |                                |
| Hypertension                          | 19 (30.6)                      |
| Chronic obstructive pulmonary disease | 14 (22.6)                      |
| Diabetes                              | 16 (25.8)                      |
| Cardiovascular disease                | 21 (33.9)                      |
| Smoking status                        |                                |
| Never                                 | 26 (41.9)                      |
| Ex-smoker                             | 27 (43.5)                      |
| Current                               | 8 (12.9)                       |
| Not available                         | 1 (1.6)                        |
| Cancer type                           |                                |
| Haematological                        | 24 (38.7)                      |
| Solid                                 | 38 (61.3)                      |
| Cancer Stage                          |                                |
| Early stage/radical intent            | 19 (30.2)                      |
| Advanced/Distant metastases           | 27 (42.9)                      |
| Unknown                               | 17 (27)                        |
| Therapy within 4 weeks of infection   |                                |
| Chemotherapy                          | 16 (25.4)                      |
| Targeted therapy                      | 3 (4.8)                        |
| Radiation therapy                     | 2 (3.2)                        |
| Immune therapy                        | 4 (6.3)                        |
| Other                                 | 6 (9.5)                        |

\*\* Can have more than one therapy

\*Other= including hormone treatment

**Supplementary table 5. Characteristics of cancer patients presenting in United Kingdom (UK) cohort**

| <b>Characteristic</b>                 | <b>Number (percentage)</b> |
|---------------------------------------|----------------------------|
| Median Age (range)                    | 70 (23-87)                 |
| Sex - Male                            | 74 (42.8)                  |
| - Female                              | 99 (57.2)                  |
| Comorbidities                         |                            |
| Hypertension                          | 64 (37.0)                  |
| Chronic obstructive pulmonary disease | 18 (10.4)                  |
| Chronic kidney disease                | 17 (9.8)                   |
| Diabetes                              | 34 (19.7)                  |
| Cardiovascular disease                | 40 (23.1)                  |
| Cancer type                           |                            |
| Haematological                        | 44 (25.4)                  |
| Solid                                 | 129 (74.6)                 |
| Cancer Stage                          |                            |
| Early stage/radical intent            | 59 (34.1)                  |
| Advanced/Distant metastases           | 109 (63)                   |
| Unknown                               | 5 (2.9)                    |
| Therapy within 4 weeks of infection   |                            |
| Chemotherapy                          | 70 (40.5)                  |
| Targeted therapy                      | 34 (19.7)                  |
| Radiation therapy                     | 14 (8.1)                   |
| Immune therapy                        | 4 (2.3)                    |
| Other                                 | 7 (4.0)                    |

\*\* Can have more than one therapy

\*Other= including hormone treatment



**Supplementary table 6. Summary of multivariable analysis performed using linear regression.**

As a dependent variable, the number of days from hospital admission to death was considered. Analysis included 81 patients. High neutrophils and advanced cancer stage were significantly associated with earlier death.

| Feature                                                             | Coefficient (95% CI)  | P value | Sig. <sup>[1]</sup> |
|---------------------------------------------------------------------|-----------------------|---------|---------------------|
| Intercept                                                           | 42.28 (15.22 - 69.33) | 0.003   | **                  |
| Age                                                                 | -0.08 (-0.35 ÷ 0.19)  | 0.543   |                     |
| Sex                                                                 | -3.98 (-9.45 ÷ 1.48)  | 0.15    |                     |
| Haematological cancer                                               | -3.92 (-9.92 ÷ 2.08)  | 0.197   |                     |
| Chemotherapy                                                        | -1.64 (-7.22 ÷ 3.93)  | 0.558   |                     |
| Immunotherapy                                                       | -2.94 (-15.8 ÷ 9.91)  | 0.649   |                     |
| Targetted therapy                                                   | -4.46 (-11.6 ÷ 2.67)  | 0.216   |                     |
| Total no. of comorbidities                                          | 0.08 (-1.87 ÷ 2.03)   | 0.938   |                     |
| C-reactive protein                                                  | -0.01 (-0.04 ÷ 0.01)  | 0.352   |                     |
| Lymphocyte                                                          | 1.39 (-0.72 ÷ 3.5)    | 0.194   |                     |
| Neutrophils                                                         | -0.51 (-0.96 ÷ -0.06) | 0.027   | *                   |
| Neutrophil/lymphocyte ratio                                         | 0.01 (-0.09 ÷ 0.11)   | 0.8     |                     |
| Platelets                                                           | -0.0 (-0.02 ÷ 0.02)   | 0.793   |                     |
| Albumin                                                             | -0.29 (-0.68 ÷ 0.11)  | 0.148   |                     |
| Cancer stage (Early/radical intent vs. advanced/distant metastases) | -6.3 (-12.37 ÷ -0.23) | 0.042   | *                   |

[1] – Significance: \* - P value < 0.05, \*\* - P value < 0.01, \*\*\* - P value < 0.001

Missing data: CRP 9.9%, lymphocyte 4.9%, neutrophil 3.7%, neutro/lympho ratio 4.9%, platelets 3.7%, albumin 14.8%, cancer stage 14.8%. Numeric variable imputed using Bayesian ridge regression (with logarithmic transformation where appropriate), cancer stage imputed using logistic regression.
