# Supplementary figures and images for: Longitudinal characterisation of haematological and biochemical parameters in cancer patients prior to and during COVID-19 reveals features associated with outcome
Source: PubMed Central journal article supplement — ESMO Open. 2020 Nov 27;6(1):100005. doi: 10.1016/j.esmoop.2020.100005 (PMC7808077; doi:10.1016/j.esmoop.2020.100005), 2020-11-27

# Supplementary figure 1.

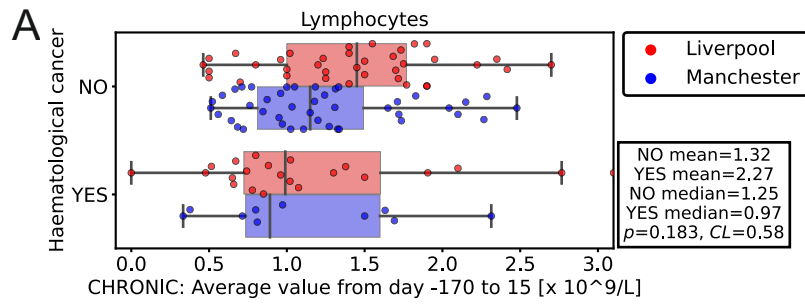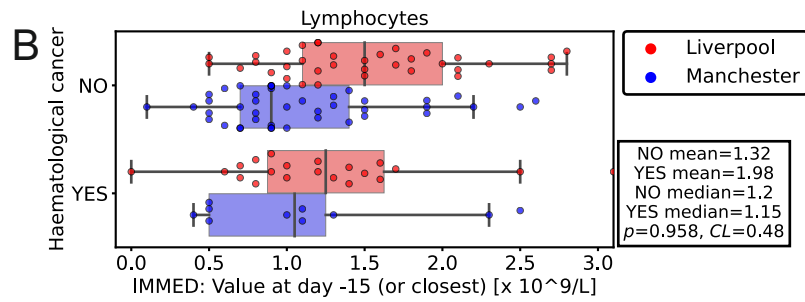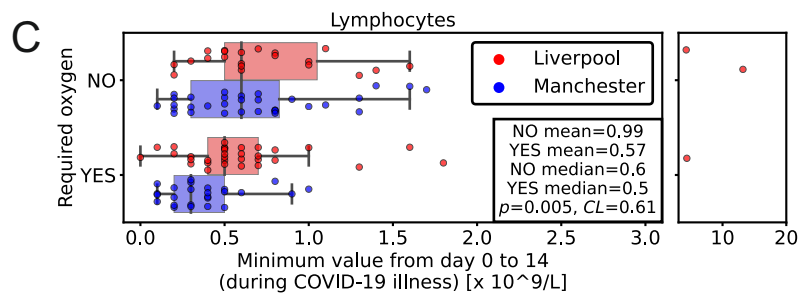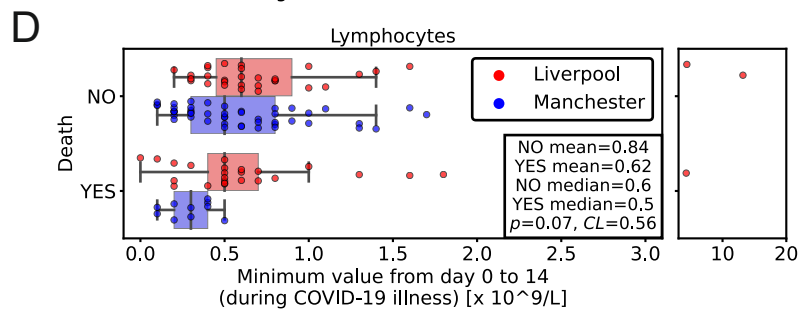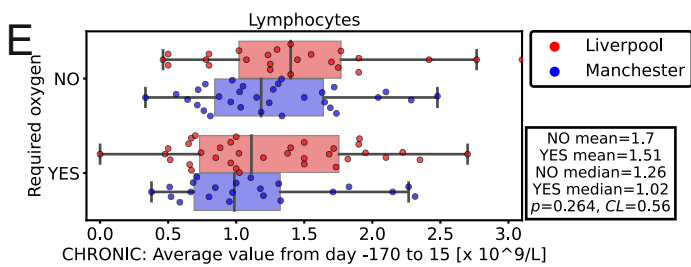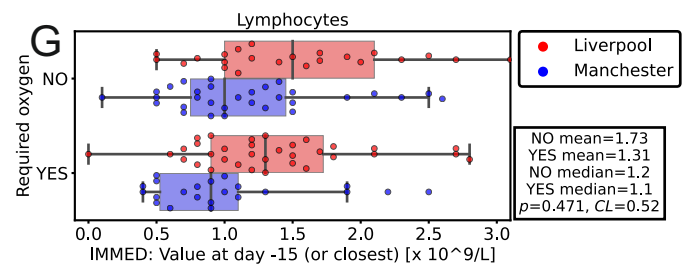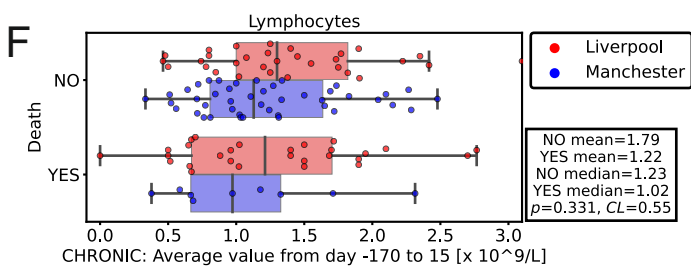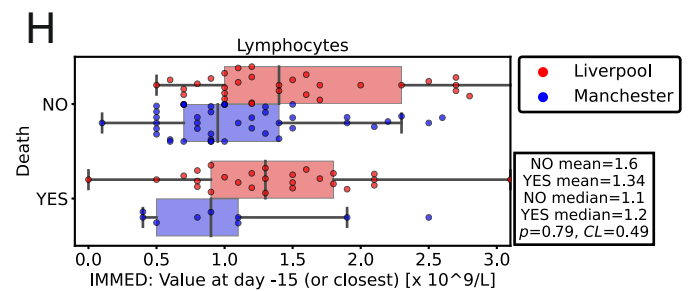

# Supplementary figure 2.

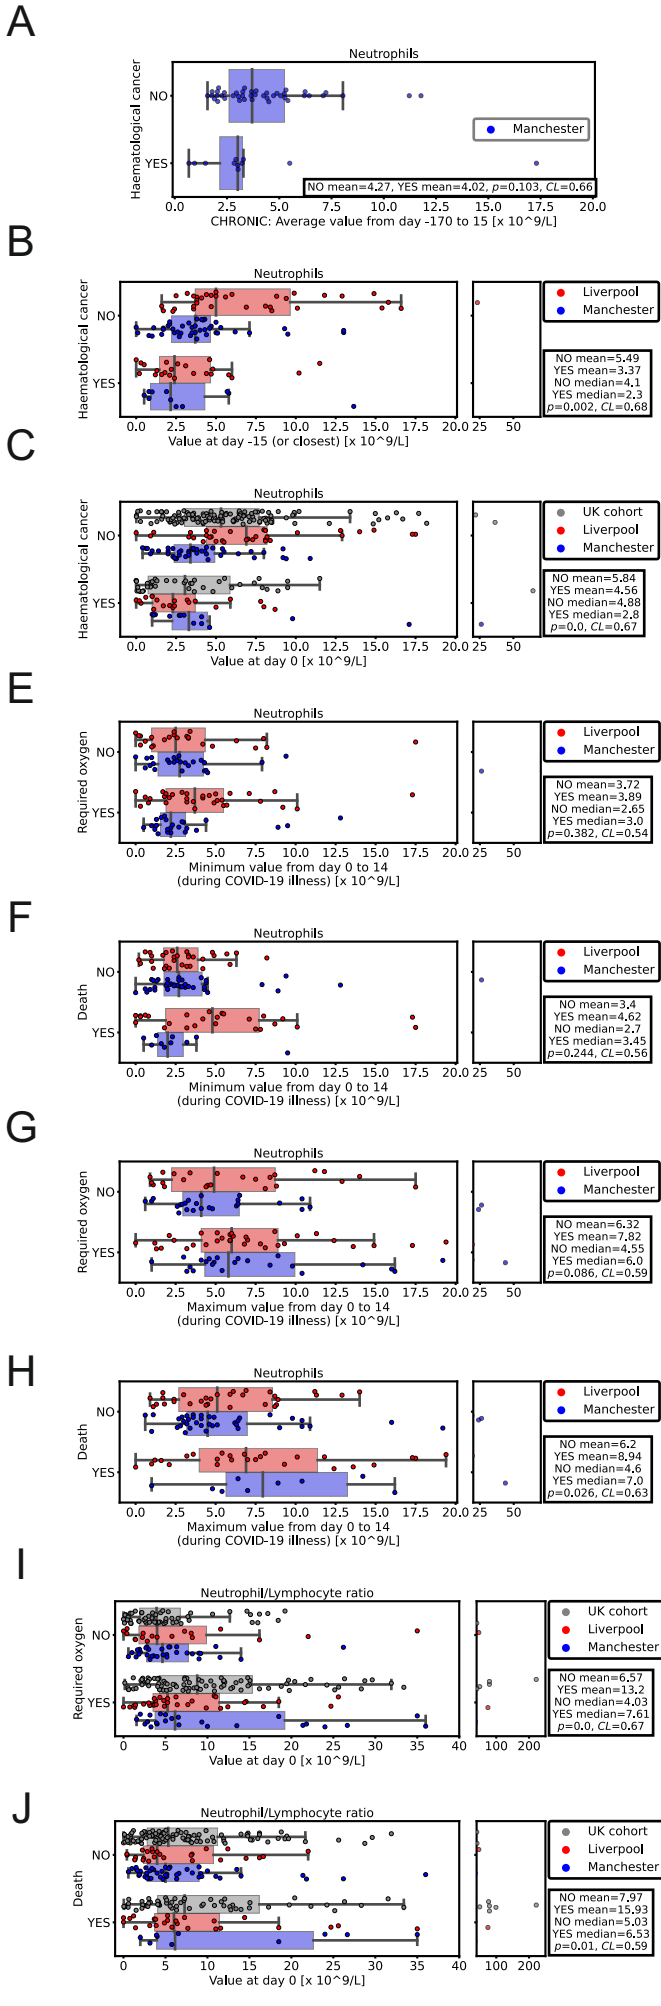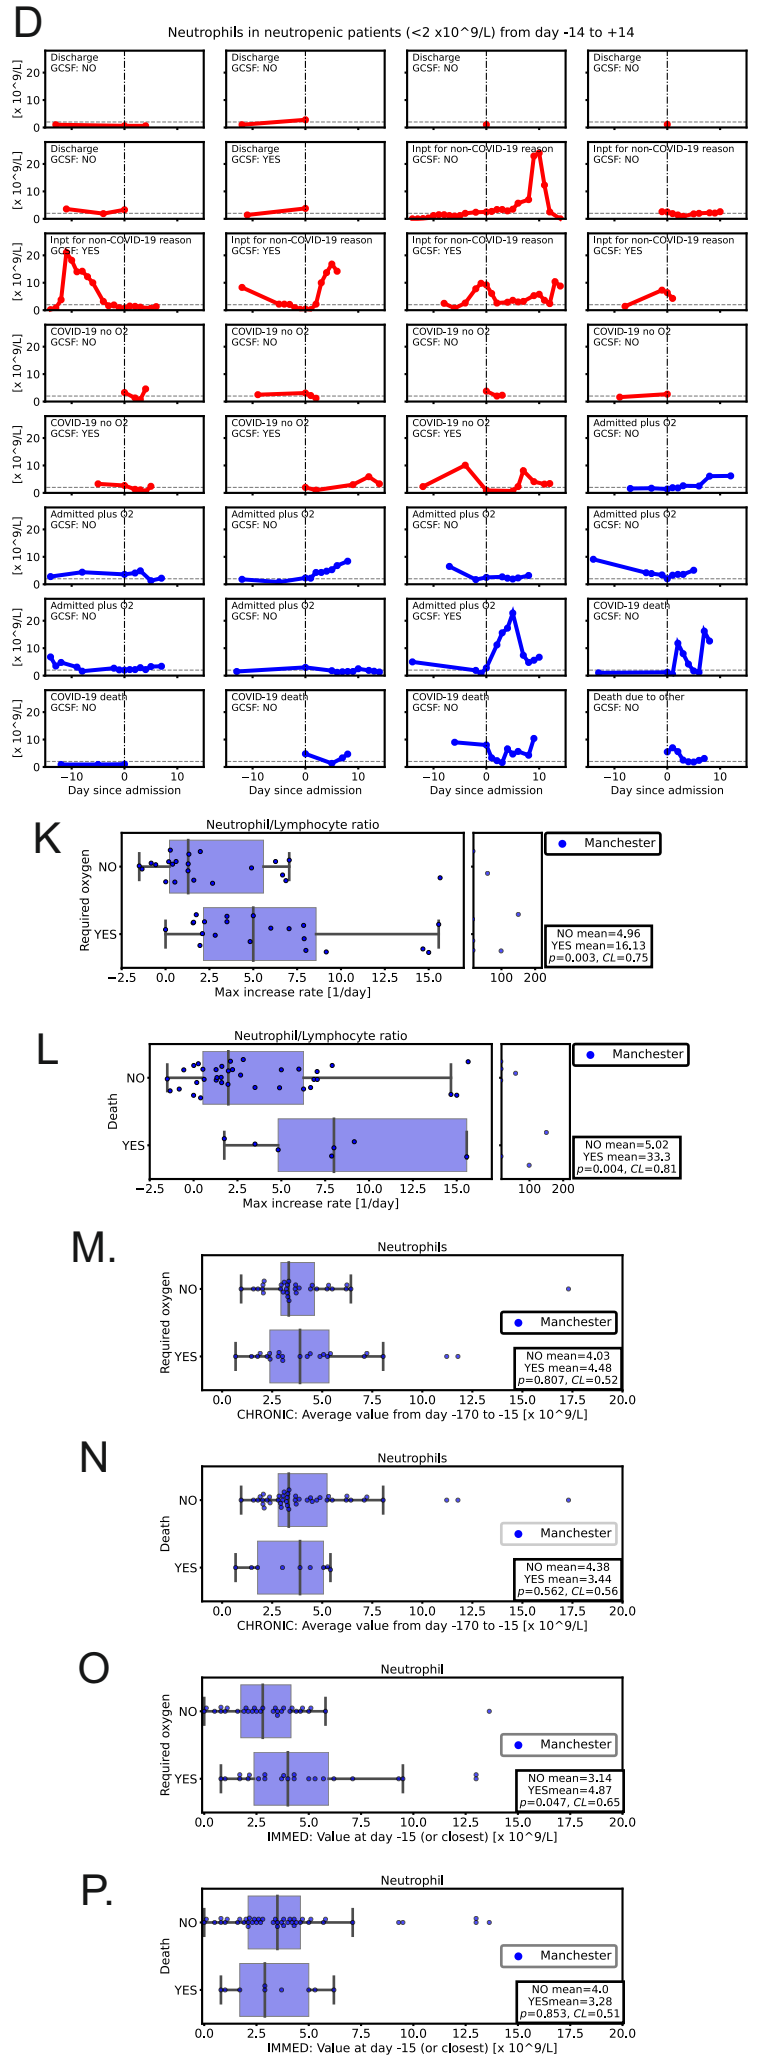

# Supplementary figure 3.

## A

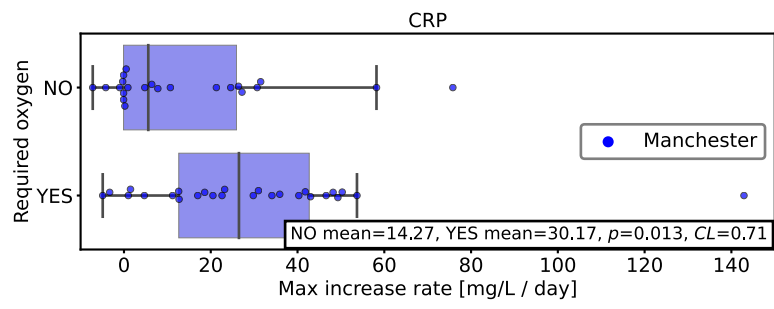

## B

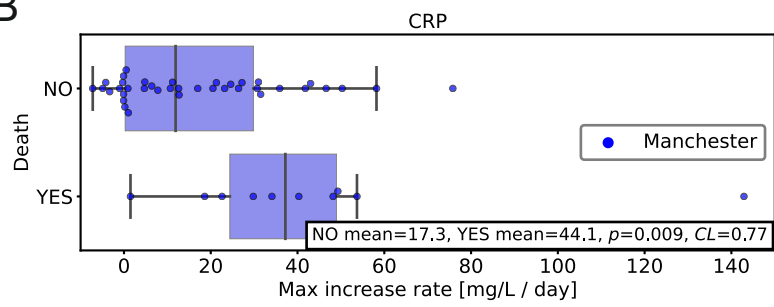

# Supplementary figure 4.

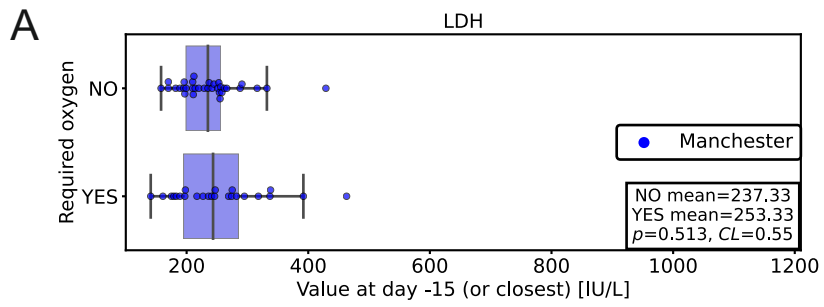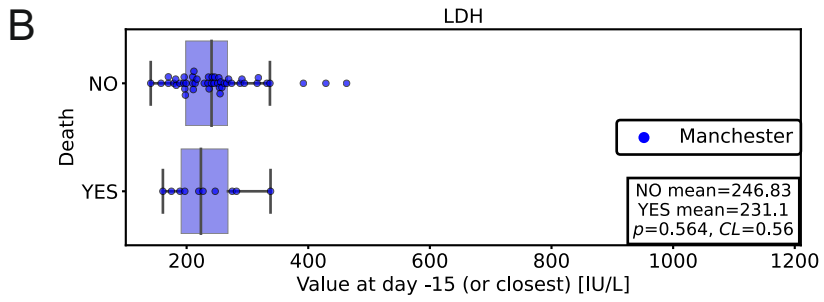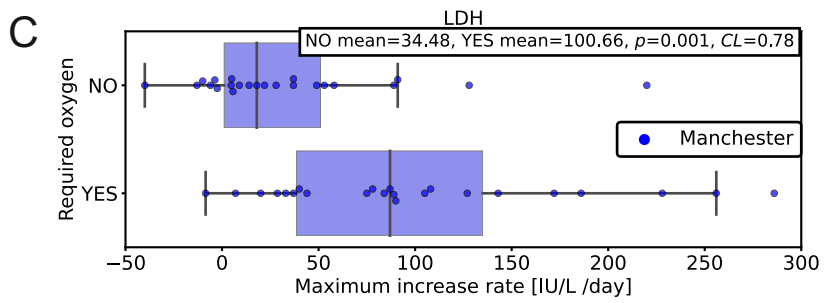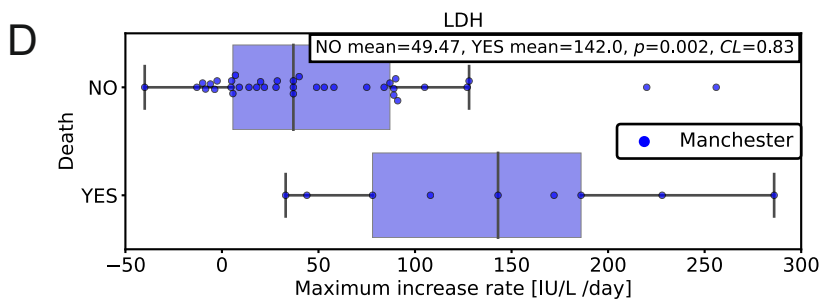

Supplement: mmc1.pdf [file mmc1.pdf]
